# Supplementary material
Source: PubMed Central journal article supplement (PMC5815022)
Supplement: jamacardiol-2-608-s002.pdf [file jamacardiol-2-608-s002.pdf]

## Supplementary Online Content

Scragg R, Stewart AW, Waayer D, et al. Effect of monthly high-dose vitamin D supplementation on cardiovascular disease in the Vitamin D Assessment study: a randomized clinical trial. *JAMA Cardiol*. Published online April 5, 2017.  
doi:10.1001/jamacardio.2017.0175

**eTable 1.** ViDA CVD Outcomes Based on Ministry of Health Hospital Discharge (A\* and B# codes) and Dispensed Prescription Data: Primary End Point I10-I82

**eTable 2.** Hazard Ratios of Cardiovascular Disease During Follow-up Associated With Baseline 25-Hydroxyvitamin D (25(OH)D) Concentration and Demographic Variables in the Placebo Group, Adjusted for All Other Variables in the Table

**This supplementary material has been provided by the authors to give readers additional information about their work.**

**eTable 1.** ViDA CVD Outcomes Based on Ministry of Health Hospital Discharge (A\* and B# codes) and Dispensed Prescription Data: Primary End Point I10-I82

| <b>Description</b>                              | <b>ICD 10 Code</b>                | <b>New disease or acute events</b>                                                                                                                                                            |
|-------------------------------------------------|-----------------------------------|-----------------------------------------------------------------------------------------------------------------------------------------------------------------------------------------------|
| Hypertension                                    | I10-I15                           | Not on treatment for hypertension at baseline AND<br>(A or B code) AND<br>No (A or B code) for other CVD                                                                                      |
| Angina pectoris                                 | I20                               | No history of angina at baseline AND <ul style="list-style-type: none"> <li>• (A or B code) OR</li> <li>• initiation of nitrate (&gt; 1 prescription) after baseline</li> </ul>               |
| Acute myocardial infarction (MI)                | I21                               | <ul style="list-style-type: none"> <li>• A code (regardless of past history)</li> <li>• B Code AND no history of MI at baseline</li> </ul>                                                    |
| Subsequent MI                                   | I22                               | A code only                                                                                                                                                                                   |
| Chronic ischaemic heart disease                 | I25                               | A code only                                                                                                                                                                                   |
| Pulmonary embolism                              | I26                               | A code only                                                                                                                                                                                   |
| Other pulmonary heart diseases                  | I27                               | A code only                                                                                                                                                                                   |
| Pericarditis, valvular, endocarditis & myositis | I30.1, I31 to I41                 | A code only                                                                                                                                                                                   |
| Cardiomyopathy                                  | I25.5, I42.0, I42.7, I42.8, I42.9 | No history of heart failure at baseline AND<br>(A or B code)                                                                                                                                  |
| Conduction disorders                            | I44, I45                          | A code only                                                                                                                                                                                   |
| Cardiac arrest                                  | I46                               | A code only                                                                                                                                                                                   |
| Arrhythmias                                     | I47-I49                           | A code only                                                                                                                                                                                   |
| Heart failure                                   | I11.0, I50.0, I50.1, I50.9        | No history of heart failure at baseline AND <ul style="list-style-type: none"> <li>• (A or B code) OR</li> <li>• initiation of loop diuretics (&gt; 1 prescription) after baseline</li> </ul> |
| Ill-defined heart disease                       | I51                               | A code only                                                                                                                                                                                   |
| Cerebral haemorrhage                            | I61,I62                           | No history of stroke at baseline AND (A or B code)                                                                                                                                            |
| Cerebral infarction                             | I63                               | No history of stroke at baseline AND (A or B code)                                                                                                                                            |

|                                                 |         |                                                    |
|-------------------------------------------------|---------|----------------------------------------------------|
| Other stroke (excl. haemorrhage)                | I64-I67 | No history of stroke at baseline AND (A or B code) |
| Diseases of the arteries, etc                   | I70-I79 | A code only                                        |
| Diseases of the veins (incl. venous thrombosis) | I80-I82 | A code only                                        |

\* A code = primary reason for hospitalization or death

# B codes = secondary reasons for hospitalization or death

**eTable 2.** Hazard Ratios of Cardiovascular Disease During Follow-up Associated With Baseline 25-Hydroxyvitamin D (25(OH)D) Concentration and Demographic Variables in the Placebo Group, Adjusted for All Other Variables in the Table

| Variable                             | Hazard Ratio (95% CI) | P-value (Wald Chi-square) |
|--------------------------------------|-----------------------|---------------------------|
| Age (years)                          |                       |                           |
| 50-59                                | 1.00                  | <0.0001                   |
| 60-69                                | 1.50 (1.01, 2.24)     |                           |
| 70-79                                | 3.67 (2.49, 5.42)     |                           |
| 80-84                                | 7.61 (4.80, 12.1)     |                           |
| Sex                                  |                       |                           |
| Male                                 | 1.50 (1.16, 1.93)     | 0.002                     |
| Female                               | 1.00                  |                           |
| Ethnicity                            |                       |                           |
| Maori                                | 1.89 (1.15, 3.11)     | 0.002                     |
| Pacific Islander                     | 2.10 (1.33, 3.32)     |                           |
| South Asian                          | 1.23 (0.68, 2.22)     |                           |
| Other                                | 1.00                  |                           |
| Baseline 25(OH)D, ng/mL <sup>a</sup> |                       |                           |
| <10                                  | 2.88 (1.65, 5.05)     | 0.002                     |
| 10-<20                               | 1.16 (0.84, 1.60)     |                           |
| 20-<30                               | 1.03 (0.78, 1.36)     |                           |
| ≥30                                  | 1.00                  |                           |

<sup>a</sup> Based on deseasonalized concentrations.
